# Supplementary material
Source: PubMed Central journal article supplement (PMC5347980)
Supplement: NIHMS844941-supplement-1.pdf [file NIHMS844941-supplement-1.pdf]

## Supplemental Materials for

### **Myocardial relaxation is accelerated by fast stretch, not reduced afterload**

Charles S Chung, Charles W Hoopes, and Kenneth S Campbell

#### SUPPLEMENTAL MATERIALS FILE INCLUDES:

Supplemental Figures

Page 2

Description of Additional Supplemental Files

Page 7

## SUPPLEMENTAL FIGURES

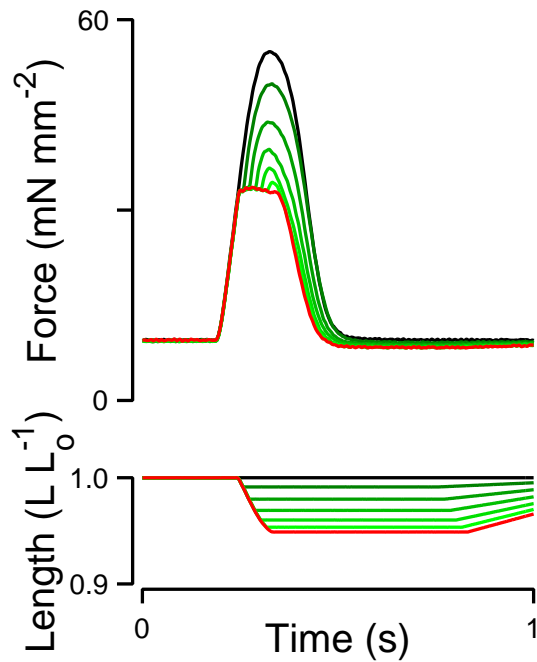

**Supplemental Figure S1.** Myocardial activation continues if a load-clamp is stopped prior to achieving its minimum length at a fixed afterload. Overlay of force (top) and myocardial length (bottom) versus time from 7 twitches. Green data show active force continues to develop if the load-clamp is stopped before minimum length is achieved. After the minimum length is achieved, active forces will decline.

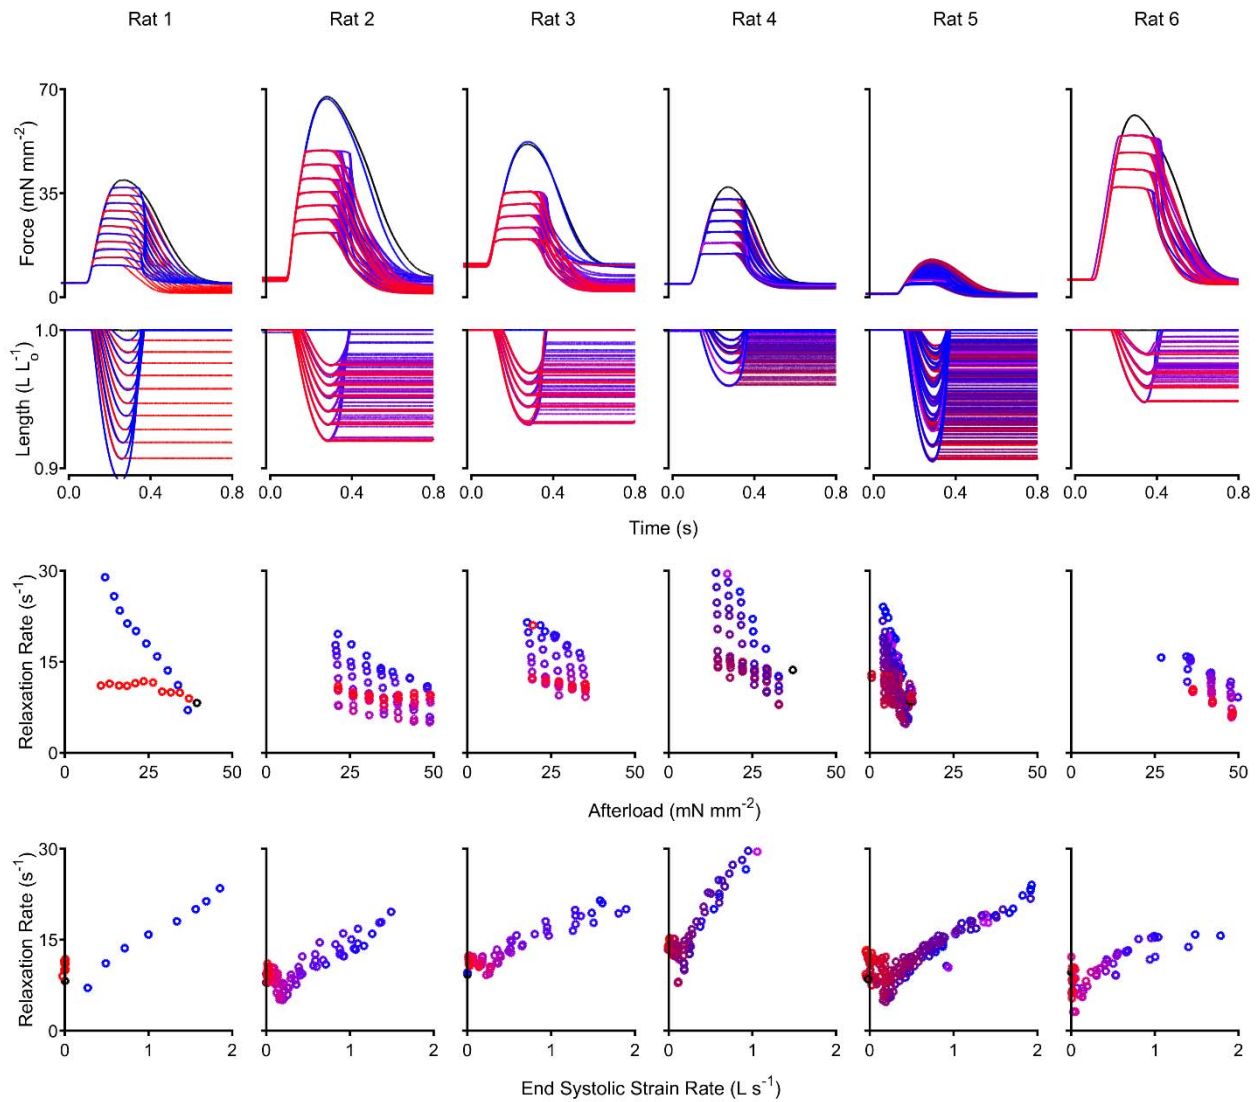

**Supplemental Figure S2.** Relaxation rate is dependent on end systolic strain rate in 6 additional rat trabeculae. Top: Force and length versus time traces. Bottom: Relationship between relaxation rate and end systolic strain rate. Each column shows multiple load-clamped twitches from an individual rat trabecula.

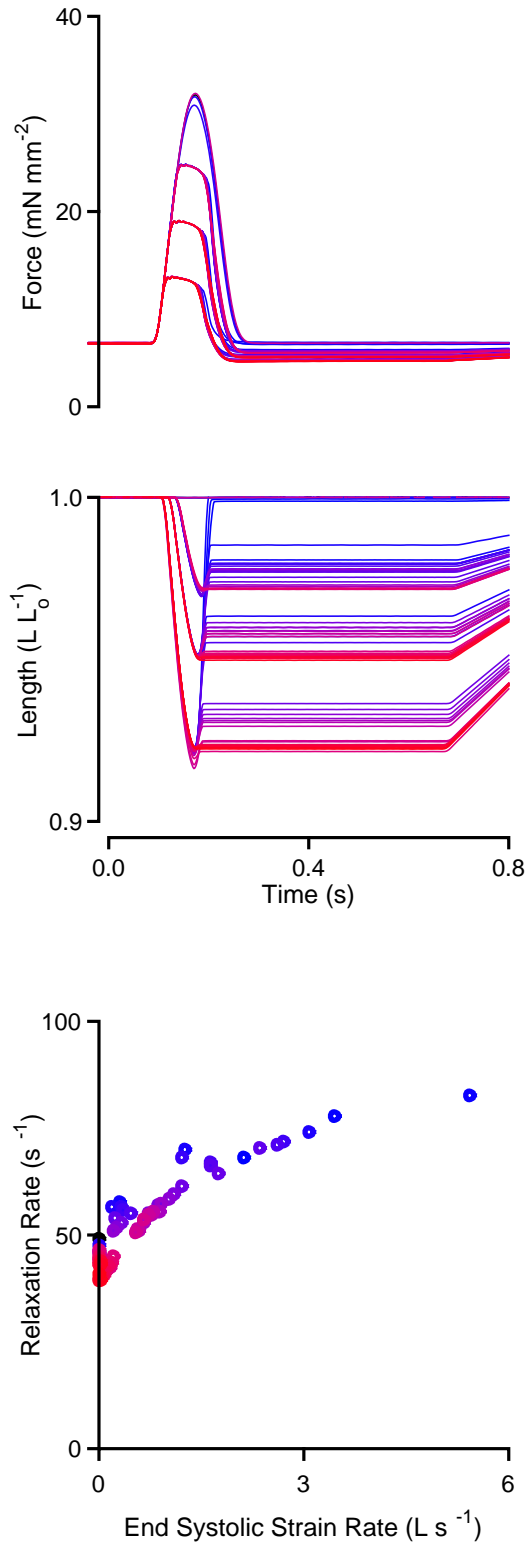

**Supplemental Figure S3.** Relaxation rate is dependent on end systolic strain rate at physiologic temperature. Top: Force and length versus time traces. Bottom: Relationship between relaxation rate and end systolic strain rate. These data were acquired at 37°C, while most other data reported in this study were acquired at 25°C.

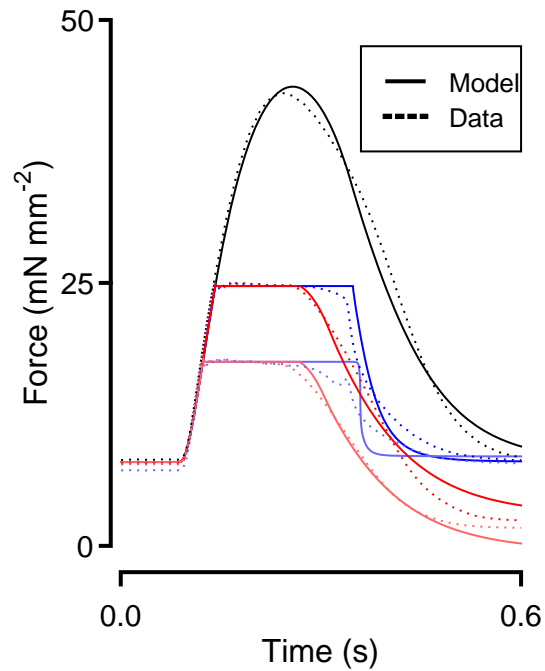

**Supplemental Fig. S4.** Model fit to experimental force versus time traces. The model imitates the load-clamp and force relaxation. Specifically, relaxation is faster during twitches in which the muscle is relengthend back to its starting length after a load-clamp (blue) than during twitches in which the muscle is held isometric (black) or held at the minimum length after a load-clamp (red).

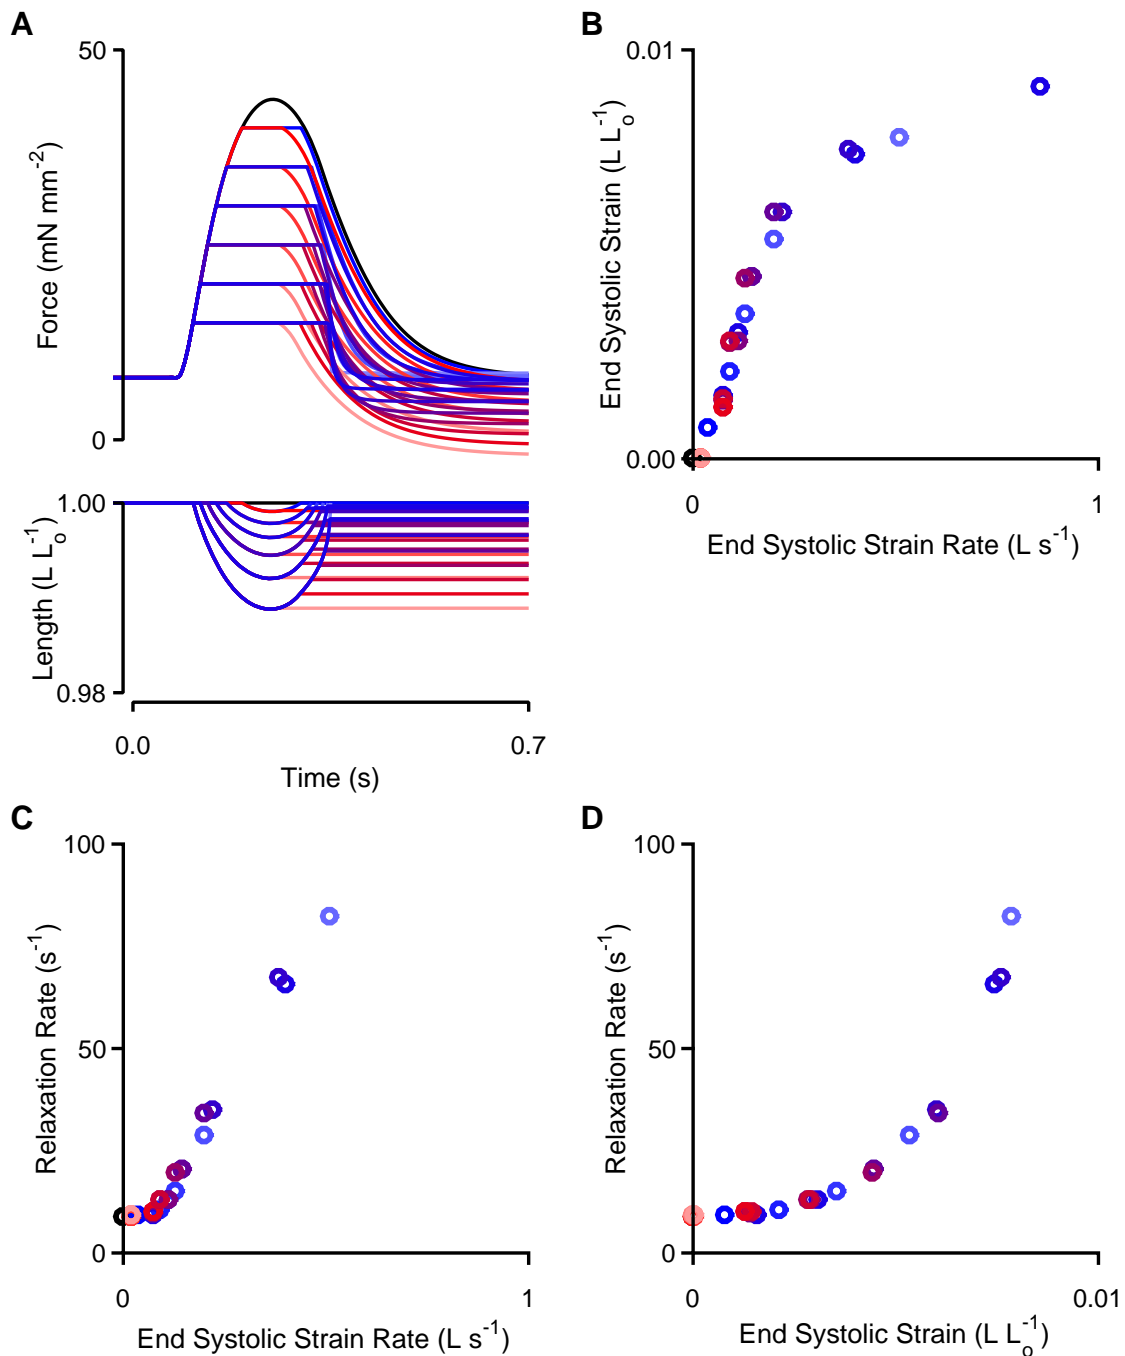

**Supplemental Figure S5.** A) Computational simulations imitate the force and length response of load-clamped twitches. B) Relationship between the magnitude (strain) and speed (strain rate) of relengthening at end systole (the end of the load-clamp). C) Relationship between relaxation rate and end systolic strain rate. D) Relationship between relaxation rate and end systolic strain. The strain rate provides a better predictor of relaxation rate at low magnitudes.

## DESCRIPTION OF ADDITIONAL SUPPLEMENTAL FILES

Additional files are included to recreate the data in Supplemental Fig. S4 and S5. Source data for Fig. 3 are the same as for Supplemental Fig. S4). The files may be opened in MyoSim version 2.2, a muscle simulation environment ([www.myosim.org](http://www.myosim.org)). (MyoSim currently runs only on the Windows Operating System.)

After downloading and installing Myosim, download the supplemental files and save them into an easily accessible location such as: C:\MyoSim\MyoSim\_instructions.

To reproduce the fits or simulation, run the MyoSim.exe, via the shortcut in the Windows Start menu or here: C:\MyoSim\MyoSim\_program\Myosim.exe. To load the downloaded files, select "File>Load complete instruction file" and select one of the instruction files (i.e. "fitting\_instruction\_file.txt"). Then press "Run Myosim".

To evaluate the fit in Supplemental Fig. S4, as described here: <http://www.myosim.org/tutorials/fitting-simulations-to-data>. Briefly, first open the fitting instruction file as noted above. Then select the "Fit>Fit Window" menu option. A new window will open. Insert the correct file path for the downloaded "fitting\_target\_file.txt". Then click the "Fit" button.

*Files for Supplemental Fig. S4 and Fig. 3:*

- fitting\_instruction\_file.txt
- fitting\_target\_file.txt

*File for Supplemental Fig. S5:*

- simulation\_instruction\_file.txt
